# Supplementary material
Source: MDPI journal article supplement (https://www.mdpi.com/2071-1050/14/11/6556)
Supplement: s1 [file s1]

**Table S1.** Description of DOMs in the co-digestion wastewater of sewage sludge and food waste revealed by SPME-GC/MS.

| Number | Retention<br>time<br>(min) | Organic compounds                                                                              | Molecular<br>weight | Match<br>(%) | Peak area | Proportion<br>(%) |
|--------|----------------------------|------------------------------------------------------------------------------------------------|---------------------|--------------|-----------|-------------------|
| 1      | 1.756                      | Carbon disulfide                                                                               | 76                  | 97           | 412496    | 0.39              |
| 2      | 2.005                      | Butyraldehyde                                                                                  | 72                  | 95           | 795682    | 0.76              |
| 3      | 8.239                      | 2-Heptanone                                                                                    | 114                 | 96           | 1496634   | 1.42              |
| 4      | 9.772                      | 6-Methylheptan-2-one                                                                           | 128                 | 95           | 737834    | 0.70              |
| 5      | 10.276                     | 1,1-Dimethoxyhexane                                                                            | 146                 | 93           | 1257949   | 1.19              |
| 6      | 10.444                     | 3-Octanone                                                                                     | 128                 | 91           | 1750606   | 1.66              |
| 7      | 10.543                     | 2-Octanone                                                                                     | 128                 | 95           | 987355    | 0.94              |
| 8      | 10.703                     | 3-Octanol                                                                                      | 130                 | 91           | 203858    | 0.19              |
| 9      | 10.873                     | $\alpha$ -Zingiberene                                                                          | 204                 | 76           | 219534    | 0.21              |
| 10     | 11.051                     | 1,4-Cineole                                                                                    | 154                 | 94           | 887321    | 0.84              |
| 11     | 11.244                     | D-Phenylalanine                                                                                | 165                 | 74           | 809841    | 0.77              |
| 12     | 11.313                     | 2-Ethylhexanol                                                                                 | 130                 | 95           | 2830425   | 2.69              |
| 13     | 11.400                     | 1,8-Cineole                                                                                    | 154                 | 96           | 7443337   | 7.07              |
| 14     | 11.619                     | Ocimene quintoxide                                                                             | 154                 | 95           | 2261283   | 2.15              |
| 15     | 11.844                     | 3-Nonen-2-one                                                                                  | 140                 | 87           | 581789    | 0.55              |
| 16     | 11.884                     | $\alpha$ -Terpinene                                                                            | 136                 | 89           | 494942    | 0.47              |
| 17     | 11.924                     | 2-hydroxy-2,6-dimethyl-6-hepten-3-one                                                          | 156                 | 87           | 307469    | 0.29              |
| 18     | 12.032                     | Acetophenone                                                                                   | 120                 | 94           | 696262    | 0.66              |
| 19     | 12.120                     | (1 $\alpha$ ,2 $\alpha$ ,5 $\alpha$ )-2-Methyl-5-(1-methyl ethyl)<br>bicyclol [3.1.0] hex-2-ol | 154                 | 89           | 967155    | 0.92              |
| 20     | 12.160                     | p-Cresol                                                                                       | 108                 | 97           | 8261808   | 7.84              |
| 21     | 12.463                     | 2-Nonanone                                                                                     | 142                 | 90           | 1887146   | 1.79              |
| 22     | 12.685                     | 4-Thujanol                                                                                     | 154                 | 91           | 986993    | 0.94              |
| 23     | 12.777                     | Thujone                                                                                        | 152                 | 96           | 1641098   | 1.56              |
| 24     | 12.916                     | 1,2,3,4-Tetramethyl -5methylene-1,3-<br>cyclopentadiene                                        | 134                 | 92           | 476900    | 0.45              |
| 25     | 12.975                     | 4-Methylene-1-(1-methyl ethyl)-bicyclol<br>[3.1.0] hex-3-ol                                    | 152                 | 83           | 3525428   | 3.35              |
| 26     | 13.091                     | trans-1-Methyl-4-(1-methyl ethyl)-2-<br>cyclohexen-1-ol                                        | 154                 | 92           | 470484    | 0.45              |
| 27     | 13.273                     | 1-Methyl-4-(1-methyl ethyl)-3-<br>cyclohexene-1-ol                                             | 154                 | 86           | 478401    | 0.45              |
| 28     | 13.332                     | 4-methylindan                                                                                  | 132                 | 86           | 425549    | 0.40              |
| 29     | 13.389                     | cis-1-Methyl-4-(1-methyl ethyl) -2-<br>cyclohexene-1-ol                                        | 154                 | 93           | 254644    | 0.24              |
| 30     | 13.500                     | (-)-Camphor                                                                                    | 152                 | 83           | 3460257   | 3.28              |
| 31     | 13.621                     | L-Menthone                                                                                     | 154                 | 95           | 1634025   | 1.55              |
| 32     | 13.683                     | Methyl decanoate                                                                               | 186                 | 73           | 573657    | 0.54              |

**Table S1.** (Continued.)

| Number | Retention<br>time<br>(min) | Organic compounds                                                                  | Molecular<br>weight | Match<br>(%) | Peak area | Proportion<br>(%) |
|--------|----------------------------|------------------------------------------------------------------------------------|---------------------|--------------|-----------|-------------------|
| 33     | 13.721                     | 3,6,6-Trimethyl-2-morphine alcohol                                                 | 154                 | 70           | 389623    | 0.37              |
| 34     | 13.768                     | Isomenthone                                                                        | 154                 | 79           | 2478471   | 2.35              |
| 35     | 13.981                     | DL-menthol                                                                         | 156                 | 93           | 722591    | 0.69              |
| 36     | 14.041                     | (-)-Terpinen-4-ol                                                                  | 154                 | 95           | 17736434  | 16.83             |
| 37     | 14.124                     | Naphthalene                                                                        | 128                 | 94           | 3483573   | 3.31              |
| 38     | 14.259                     | $\alpha$ -Terpineol                                                                | 154                 | 95           | 10439884  | 9.91              |
| 39     | 14.303                     | trans-2-Methyl-5-(1-methylethenyl)-<br>cyclohexanone                               | 152                 | 91           | 731837    | 0.69              |
| 40     | 14.372                     | 2-methyl-5-(1-methylethyl)-cyclohexanone                                           | 154                 | 93           | 425330    | 0.40              |
| 41     | 14.623                     | 4-(2-methoxypropyl)-1-methylcyclohex-1-<br>ene                                     | 168                 | 91           | 2110878   | 2.00              |
| 42     | 14.683                     | Terpinyl acetate                                                                   | 196                 | 88           | 566095    | 0.54              |
| 43     | 15.073                     | 5-Nitrouracil-1-phenyl-1-hexene-3-ol                                               | 221                 | 71           | 171902    | 0.16              |
| 44     | 15.132                     | 2-N-propylphenol                                                                   | 136                 | 97           | 4732878   | 4.49              |
| 45     | 15.345                     | 2,3,4a,5,6,7,8,8a-<br>Octahydrospiro[naphthalene-1(4H),2'-<br>[1,3]dioxolan]-4-one | 210                 | 75           | 270903    | 0.26              |
| 46     | 15.668                     | 4-hydroxybenzohydrazide                                                            | 156                 | 75           | 325781    | 0.31              |
| 47     | 15.719                     | Indole                                                                             | 117                 | 75           | 3988612   | 3.79              |
| 48     | 15.833                     | 6-Ethyl-7-hydroxy-4-octen-3-one                                                    | 170                 | 71           | 425188    | 0.40              |
| 49     | 15.987                     | cis-4-Methoxycypressane                                                            | 168                 | 71           | 265617    | 0.25              |
| 50     | 16.216                     | Methyl methoxy(3-methoxyphenyl)acetate                                             | 210                 | 76           | 248159    | 0.24              |
| 51     | 16.467                     | 7-Methoxy-3,7-dimethyloctanal                                                      | 186                 | 88           | 1218890   | 1.16              |
| 52     | 16.859                     | Turnip alcohol                                                                     | 154                 | 74           | 228895    | 0.22              |
| 53     | 16.983                     | 5-Methyl-1,2,3,4- tetrasulfide                                                     | 170                 | 95           | 548107    | 0.52              |
| 54     | 17.043                     | 3-Methylindole                                                                     | 131                 | 95           | 2543919   | 2.41              |
| 55     | 17.851                     | 3,5-Dimethylphenyl acetate                                                         | 164                 | 85           | 172603    | 0.16              |
| 56     | 18.032                     | 2,5-Di-tert-butyl-1,4-benzoquinone                                                 | 220                 | 87           | 380548    | 0.36              |
| 57     | 18.139                     | 2,6-Di-tert-butyl-1,4-benzoquinone                                                 | 220                 | 80           | 465586    | 0.44              |
| 58     | 19.155                     | Eleuthero                                                                          | 222                 | 89           | 167133    | 0.16              |
| 59     | 24.868                     | Cyclic octa-atomic sulfur                                                          | 256                 | 95           | 897424    | 0.85              |

**Table S2.** Description of DOMs in the effluent of the hydrolytic/acidogenic tank revealed by SPME-GC/MS.

| Number | Retention<br>time<br>(min) | Organic compounds                                                      | Molecular<br>weight | Match<br>(%) | Peak<br>area | Proportion<br>(%) |
|--------|----------------------------|------------------------------------------------------------------------|---------------------|--------------|--------------|-------------------|
| 1      | 8.241                      | 2-Heptanone                                                            | 114                 | 95           | 1058747      | 1.0759            |
| 2      | 8.577                      | 2-Heptanol                                                             | 116                 | 95           | 575247       | 0.5846            |
| 3      | 9.771                      | 6-Methyl-2-heptanone                                                   | 128                 | 95           | 615029       | 0.625             |
| 4      | 10.051                     | 6-Methyl-2-heptanol                                                    | 130                 | 95           | 214839       | 0.2183            |
| 5      | 10.273                     | Hexanal dimethyl acetal                                                | 146                 | 92           | 1802836      | 1.8321            |
| 6      | 10.445                     | 3-Octanone                                                             | 128                 | 93           | 1976206      | 2.0082            |
| 7      | 10.54                      | sec-Octanone                                                           | 128                 | 95           | 1219899      | 1.2397            |
| 8      | 10.62                      | (±)-6-Methyl-5-heptenyl-2-ol                                           | 128                 | 92           | 504835       | 0.513             |
| 9      | 10.696                     | 3-Octanol                                                              | 130                 | 94           | 600200       | 0.6099            |
| 10     | 10.796                     | secOctanol                                                             | 130                 | 95           | 540262       | 0.549             |
| 11     | 10.871                     | 4,4-Dimethyl-cyclohex-2-en-1-ol                                        | 126                 | 77           | 410360       | 0.417             |
| 12     | 11.049                     | 1,4-Eudesmanin                                                         | 154                 | 94           | 734389       | 0.7463            |
| 13     | 11.092                     | 4-Methyl-3-(1-methylethylidene)-cyclohexene                            | 136                 | 91           | 229922       | 0.2336            |
| 14     | 11.243                     | 1,3-Dithiane                                                           | 120                 | 76           | 984349       | 1.0003            |
| 15     | 11.317                     | 2-(methyl)-aurinol                                                     | 186                 | 87           | 723698       | 0.7354            |
| 16     | 11.397                     | Eucalyptol                                                             | 154                 | 97           | 6687854      | 6.7962            |
| 17     | 11.617                     | 2,2-dimethyl-5-(1-methyl-1-propenyl)tetrahydrofuran                    | 154                 | 95           | 1823599      | 1.8532            |
| 18     | 11.841                     | 3-nonen-2-one                                                          | 140                 | 84           | 318372       | 0.3235            |
| 19     | 11.883                     | 2,5-dimethyl-3-vinyl-1,4-hexadiene                                     | 136                 | 79           | 723721       | 0.7354            |
| 20     | 11.921                     | 2-Hydroxy-2,6-dimethyl-6-hepten-3-one                                  | 156                 | 88           | 366826       | 0.3728            |
| 21     | 12.031                     | acetophenone                                                           | 120                 | 92           | 767901       | 0.7803            |
| 22     | 12.119                     | cis-β-pinoresinol                                                      | 154                 | 90           | 1496631      | 1.5209            |
| 23     | 12.195                     | 2-Cyclopropyl-2-nitro-1-phenyl - ethanol                               | 207                 | 68           | 751461       | 0.7636            |
| 24     | 12.244                     | 6-Methyl-5-octen-2-one                                                 | 140                 | 77           | 188930       | 0.192             |
| 25     | 12.46                      | 2-nonanone                                                             | 142                 | 79           | 1745580      | 1.7739            |
| 26     | 12.675                     | (1a,2a,5.a)-2-methyl-5-(1-methylethyl)-bicyclo[3.1.0]hexan-2-ol        | 154                 | 93           | 1327583      | 1.3491            |
| 27     | 12.773                     | Cliffordone                                                            | 152                 | 95           | 1506304      | 1.5307            |
| 28     | 12.971                     | [1S-(1a,3a,5a)]-4-methylene-1-(1-methylethyl)-bicyclo[3.1.0]hexan-3-ol | 152                 | 87           | 2891354      | 2.9382            |
| 29     | 13.087                     | trans-1-methyl-4-(1-methylethyl)-2-cyclohexen-1-ol                     | 154                 | 92           | 437476       | 0.4446            |
| 30     | 13.293                     | 2-pentylcyclopentanone                                                 | 154                 | 90           | 357351       | 0.3631            |
| 31     | 13.387                     | cis-1-methyl-4-(1-methylethyl)-2-cyclohexen-1-ol                       | 154                 | 93           | 292104       | 0.2968            |
| 32     | 13.492                     | L-camphor                                                              | 152                 | 89           | 2774060      | 2.819             |
| 33     | 13.619                     | L-menthone                                                             | 154                 | 96           | 1883517      | 1.914             |

**Table S2.** (Continued)

| Number | Retention<br>time<br>(min) | Organic compounds                                                               | Molecular<br>weight | Match | number   | Proportion<br>(%) |
|--------|----------------------------|---------------------------------------------------------------------------------|---------------------|-------|----------|-------------------|
| 34     | 13.765                     | Isomenthone                                                                     | 154                 | 80    | 2325063  | 2.3627            |
| 35     | 13.849                     | 8-Hydroxymenthol                                                                | 172                 | 87    | 691046   | 0.7022            |
| 36     | 13.983                     | DL-Menthol                                                                      | 156                 | 94    | 890402   | 0.9048            |
| 37     | 14.043                     | (-)-4-terpinol                                                                  | 154                 | 95    | 20031310 | 20.356            |
| 38     | 14.141                     | 2-Isopropyl-5-methylanisole                                                     | 164                 | 75    | 2643933  | 2.6868            |
| 39     | 14.26                      | $\alpha$ -Pinoresinol                                                           | 154                 | 95    | 13181292 | 13.395            |
| 40     | 14.304                     | 2-Methyl-5-(1-methylethenyl)cyclohexanone                                       | 152                 | 90    | 1141242  | 1.1597            |
| 41     | 14.369                     | 2-Methyl-5-(1-methylethyl)cyclohexanone                                         | 154                 | 94    | 831572   | 0.845             |
| 42     | 14.435                     | 2-Hydroxyethyl-3-oxo-butanoic acid                                              | 146                 | 71    | 485636   | 0.4935            |
| 43     | 14.621                     | 4-(2-methoxypropan-2-yl)-1-methylcyclohex-1-ene                                 | 168                 | 92    | 2082547  | 2.1163            |
| 44     | 14.681                     | (. +/-. )-2-carene                                                              | 136                 | 91    | 448328   | 0.4556            |
| 45     | 15.132                     | 2-Propylphenol                                                                  | 136                 | 97    | 6333431  | 6.4361            |
| 46     | 15.241                     | Tetrahydrolinalool                                                              | 158                 | 83    | 231119   | 0.2349            |
| 47     | 15.344                     | 3-[2-pentenyl]-4-methyl-tetrahydrofuran-2-one                                   | 168                 | 76    | 386099   | 0.3924            |
| 48     | 15.667                     | 7-Methoxy-3,7-dimethyloctanal                                                   | 196                 | 74    | 281135   | 0.2857            |
| 49     | 15.833                     | 6-ethyl-7-hydroxy-4-octen-3-one                                                 | 170                 | 73    | 536392   | 0.5451            |
| 50     | 15.988                     | 1-methoxy-3,5-dimethyl-cyclohexene                                              | 140                 | 69    | 397779   | 0.4042            |
| 51     | 16.213                     | 1,1-dimethyl-2-(1-methylethoxy)-3-(3-methyl-1-pentynyl)-cyclopropane            | 208                 | 72    | 302145   | 0.307             |
| 52     | 16.465                     | 8-methoxy-5,5,8-trimethyl-3-nonen-2-one                                         | 212                 | 83    | 1779578  | 1.8084            |
| 53     | 16.857                     | 4-(2-methoxyprop-2-yl)-1-methylcyclohex-1-ene                                   | 168                 | 79    | 374387   | 0.3805            |
| 54     | 17.041                     | 3-Methylindole                                                                  | 131                 | 96    | 3060208  | 3.1098            |
| 55     | 17.849                     | 3-Cyclopentylpropionic acid,3,5-dimethylphenyl ester                            | 246                 | 87    | 248059   | 0.2521            |
| 56     | 18.029                     | 2,5-Di-tert-butyl-1,4-benzoquinone                                              | 220                 | 86    | 368641   | 0.3746            |
| 57     | 19.153                     | Elemiol                                                                         | 222                 | 90    | 280805   | 0.2854            |
| 58     | 20.137                     | Hinokiol                                                                        | 222                 | 91    | 326219   | 0.3315            |
| 59     | 21.308                     | 4,6,6-trimethyl-2-(3-methylbutane-1,3-dienyl)-3-oxatricyclo[5.1.0.0(2,4)]octane | 218                 | 85    | 215454   | 0.2189            |

**Table S3.** Shared DOMs between the influent and the effluent of the hydrolytic/acidogenic tank revealed by SPME-GC/MS.

| Number | Organic compounds                                                                         | Peak area |          |            |
|--------|-------------------------------------------------------------------------------------------|-----------|----------|------------|
|        |                                                                                           | Influent  | effluent | Change (%) |
| 1      | 2-Heptanone                                                                               | 1496634   | 1058747  | 29         |
| 2      | 6-Methyl-2-heptanone                                                                      | 737834    | 615029   | 17         |
| 3      | Hexanal dimethyl acetal                                                                   | 1257949   | 1802836  | -43        |
| 4      | 3-Octanone                                                                                | 1750606   | 1976206  | -13        |
| 5      | 3-Octanol                                                                                 | 203858    | 600200   | -194       |
| 6      | 1,4-Eudesmanin                                                                            | 887321    | 734389   | 17         |
| 7      | Eucalyptol                                                                                | 7443337   | 6687854  | 10         |
| 8      | 2,2-dimethyl-5-(1-methyl-1-propenyl)tetrahydrofuran                                       | 2261283   | 1823599  | 19         |
| 9      | 3-nonen-2-one                                                                             | 581789    | 318372   | 45         |
| 10     | 2-Hydroxy-2,6-dimethyl-6-hepten-3-one                                                     | 307469    | 366826   | -19        |
| 11     | acetophenone                                                                              | 696262    | 767901   | -10        |
| 12     | (1 $\alpha$ ,2 $\alpha$ ,5 $\alpha$ )-2-methyl-5-(1-methylethyl)-bicyclo[3.1.0]hexan-2-ol | 967155    | 1327583  | -37        |
| 13     | 2-nonanone                                                                                | 1887146   | 1745580  | 8          |
| 14     | Cliffordone                                                                               | 1641098   | 1506304  | 8          |
| 15     | [1S-(1a,3a,5a)]-4-methylene-1-(1-methylethyl)-bicyclo[3.1.0]hexan-3-ol                    | 3525428   | 2891354  | 18         |
| 16     | trans-1-methyl-4-(1-methylethyl)-2-cyclohexen-1-ol                                        | 470484    | 437476   | 7          |
| 17     | cis-1-methyl-4-(1-methylethyl)-2-cyclohexen-1-ol                                          | 254644    | 292104   | -15        |
| 18     | L-camphor                                                                                 | 3460257   | 2774060  | 20         |
| 19     | L-menthone                                                                                | 1634025   | 1883517  | -15        |
| 20     | Isomenthone                                                                               | 2478471   | 2325063  | 6          |
| 21     | DL-Menthol                                                                                | 722591    | 890402   | -23        |
| 22     | (-)-4-terpinol                                                                            | 17736434  | 20031310 | -13        |
| 23     | $\alpha$ -Pinoresinol                                                                     | 10439884  | 13181292 | -26        |
| 24     | 2-Methyl-5-(1-methylethenyl)cyclohexanone                                                 | 425330    | 1141242  | -168       |
| 25     | 4-(2-methoxypropan-2-yl)-1-methylcyclohex-1-ene                                           | 2110878   | 2082547  | 1          |
| 26     | 2-Propylphenol                                                                            | 4732878   | 6333431  | -34        |
| 27     | 6-ethyl-7-hydroxy-4-octen-3-one                                                           | 425188    | 536392   | -26        |
| 28     | 7-methoxy-3,7-dimethyl-octanal                                                            | 1218890   | 281135   | 77         |
| 29     | 3-Methylindole                                                                            | 2543919   | 3060208  | -20        |
| 30     | 2,5-Di-tert-butyl-1,4-benzoquinone                                                        | 380548    | 368641   | 3          |
| 31     | Eleuthero                                                                                 | 167133    | 280805   | -68        |

**Table S4.** Description of DOMs in the effluent of the two-stage A/O process revealed by SPME-GC/MS.

| Number | Retention<br>(min) | Organic compounds                                       | Molecular<br>weight | Match<br>(%) | Peak<br>area | Proportion<br>(%) |
|--------|--------------------|---------------------------------------------------------|---------------------|--------------|--------------|-------------------|
| 1      | 1.372              | Ethylamine                                              | 45                  | 76           | 4530         | 0.51              |
| 2      | 1.383              | L-lactic acid                                           | 90                  | 83           | 7676         | 0.87              |
| 3      | 1.391              | Isopropanol                                             | 60                  | 75           | 6167         | 0.70              |
| 4      | 2.572              | Chloropicrin                                            | 163                 | 92           | 135434       | 15.31             |
| 5      | 8.321              | 1,1,3-trimethoxypropane                                 | 134                 | 95           | 240121       | 27.15             |
| 6      | 11.62              | 2,2-dimethyl-5-(1-methyl-1-propenyl)<br>tetrahydrofuran | 154                 | 86           | 29538        | 3.34              |
| 7      | 12.715             | Nonyl aldehyde                                          | 142                 | 94           | 96937        | 10.96             |
| 8      | 13.233             | 2-Methyl-1,3-dioxolane-2-butanol                        | 160                 | 73           | 44946        | 5.08              |
| 9      | 14.175             | lemon cyclic ether                                      | 154                 | 67           | 59804        | 6.76              |
| 10     | 15.339             | 3-methoxy-2,3-dimethyl-1-butene                         | 114                 | 76           | 46791        | 5.29              |
| 11     | 15.832             | 2,4-dimethyl-1,3-cyclopentanedione                      | 126                 | 78           | 65106        | 7.36              |
| 12     | 15.980             | 2,5,5-trimethyl-3-hexyn-2-ol                            | 140                 | 74           | 74613        | 8.44              |
| 13     | 16.448             | cis-6,7-diethyldecahydro-1,4-<br>methanonaphthalene     | 206                 | 74           | 31995        | 3.62              |
| 14     | 20.832             | 2,6,10-trimethyldodecane                                | 212                 | 88           | 40709        | 4.60              |

**Table S5.** Description of DOMs in the effluent of the ultrafiltration units revealed by SPME-GC/MS.

| Number | Retention<br>time<br>(min) | Organic compounds                                               | Molecular<br>weight | Match<br>(%) | Peak<br>area | Proportion<br>(%) |
|--------|----------------------------|-----------------------------------------------------------------|---------------------|--------------|--------------|-------------------|
| 1      | 2.013                      | n-Butyl isocyanate acetate                                      | 157                 | 92           | 84025        | 5.06              |
| 2      | 2.560                      | Chloropicrin                                                    | 163                 | 89           | 114642       | 6.90              |
| 3      | 8.301                      | 1,1,3-trimethoxypropane                                         | 134                 | 96           | 398405       | 23.97             |
| 4      | 12.705                     | Nonyl aldehyde                                                  | 142                 | 97           | 521770       | 31.39             |
| 5      | 13.228                     | 2-Methyl-1,3-dioxolane-2-butanol                                | 160                 | 72           | 71366        | 4.29              |
| 6      | 14.169                     | lemon cyclic ether                                              | 154                 | 71           | 71066        | 4.28              |
| 7      | 15.831                     | 2,4-dimethyl-1,3-cyclopentanedione                              | 126                 | 77           | 97748        | 5.88              |
| 8      | 15.977                     | 2,5,5-trimethyl-3-hexyn-2-ol                                    | 140                 | 74           | 95116        | 5.72              |
| 9      | 16.444                     | 5,5-dimethyl-3-(3-methyl-cyclooxiran-2-yl)-<br>cyclohex-2-enone | 180                 | 77           | 112731       | 6.78              |
| 10     | 18.132                     | 2,5-Di-tert-butyl-1,4-benzoquinone                              | 220                 | 75           | 95202        | 5.73              |
